# Supplementary material for: Hydrothermal synthesis of hollow Ca2Ge7O16microspheres as high-capacity anodes for Li-ion batteries with long cycling life
Source: Royal Society of Chemistry journal article supplement (doi:10.1039/c4ra08927h), 2014-09-22
Supplement: c4ra08927h1.pdf [file c4ra08927h1.pdf]

## Experimental

**Hydrothermal of urchin-like  $\text{Ca}_2\text{Ge}_7\text{O}_{16}$  hollow spheres** In a typical synthesis, 0.35 mmol  $\text{GeO}_2$ , 0.1 mmol  $\text{CaCl}_2$  and 1 g N-methyl urea was dispersed to 35 ml distilled water, then stirring for 30 min. The mixture was then transferred to an autoclave of 50 mL which was heated to 240 °C for 12 h. The white precipitation was centrifuged, filtered, and rinsed with alcohol and distilled water for three times. Finally, the product was dried at 80 °C for 24 h in oven.

**Characterization** The X-ray diffraction (XRD) patterns of the products were recorded with Rigaku D/max Diffraction System using a  $\text{Cu K}\alpha$  source ( $\lambda = 0.15406$  nm). The scanning electron microscopy (SEM) images were taken with a JEOLJSM-6700F field emission scanning electron microscope (15 kV). The transmission electron microscopy (HR-TEM) images were taken on a JEOL 2010 high-resolution transmission electron microscope performed at 200 kV. The specimen of HR-TEM measurement was prepared via spreading a droplet of ethanol suspension onto a copper grid, coated with a thin layer of amorphous carbon film, and allowed to dry in air.

**Electrochemical Test** The electrochemical Li intercalation performance was investigated in Li test cells. Typically, the electrode consisted of 80 wt% active material, 10 wt% conductivity agents (acetylene black), and 10 wt% binder (carboxyl methyl cellulose). After ethanol was evaporated, the mixture was rolled into a sheet and cut into circular strips of 12 mm diameter. The strips were then dried at 120 °C

for 10 h in air. Lithium metal was used as the counter and reference electrodes. The electrolyte consisted of a solution of 1 M  $\text{LiPF}_6$  in ethylene carbonate/dimethyl carbonate/diethyl carbonate (1:1:1, in weight percent). The above three parts were assembled into test cells in an argon-filled dry glovebox, and then the cells were measured at different current densities within a voltage range of 0.01-3.0 V with a Land CT 2001 battery tester.

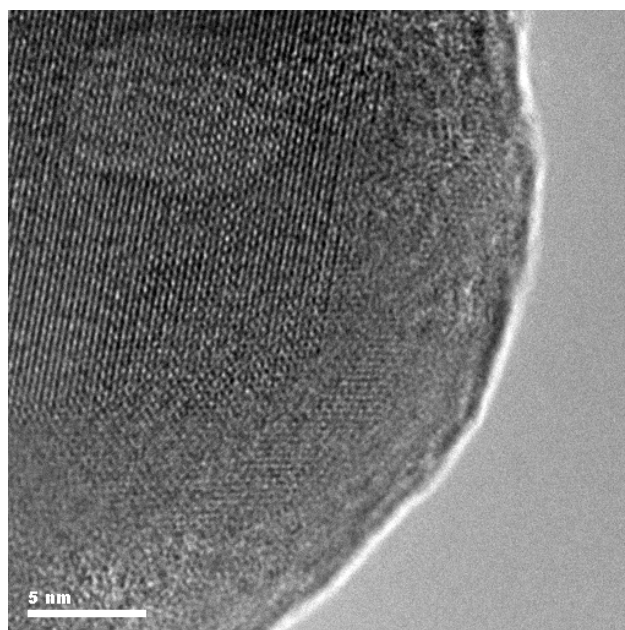

**Fig. S1** HRTEM image of UHS-1.

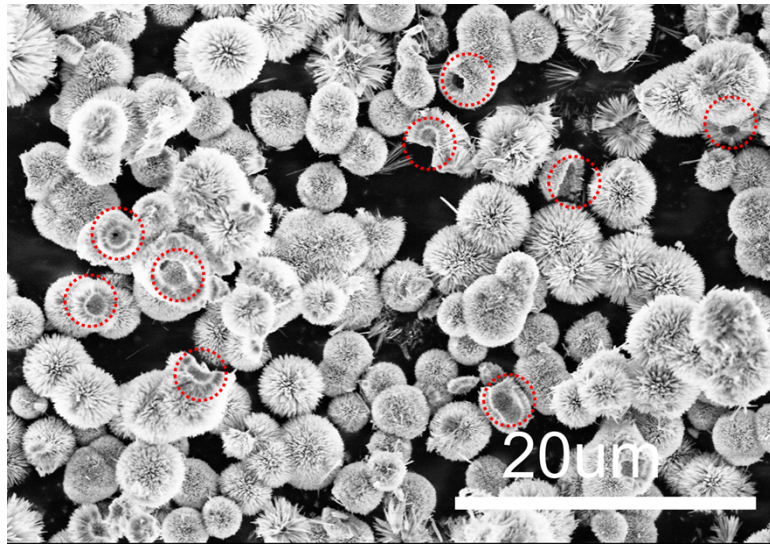

Fig. S2 SEM images of UHS-2.

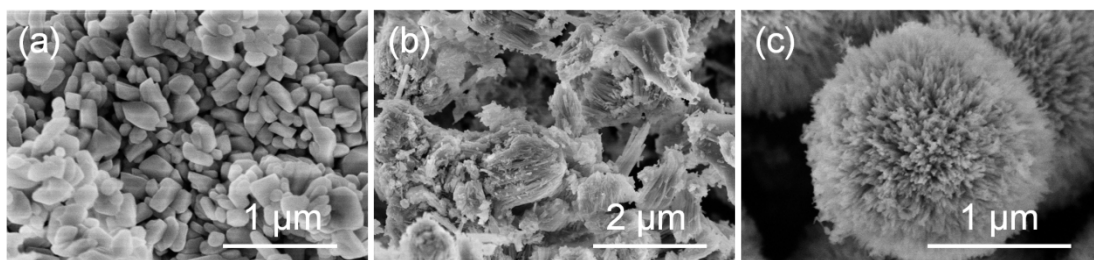

**Fig. S3** SEM images of UHS-1 at different times: (a) 10 min, (b) 20 min, and (c) 30 min.

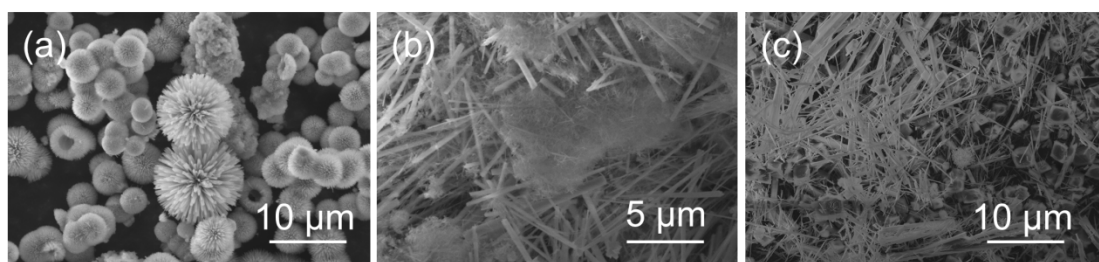

**Fig. S4** (a-c) SEM images of samples synthesized under different conditions.

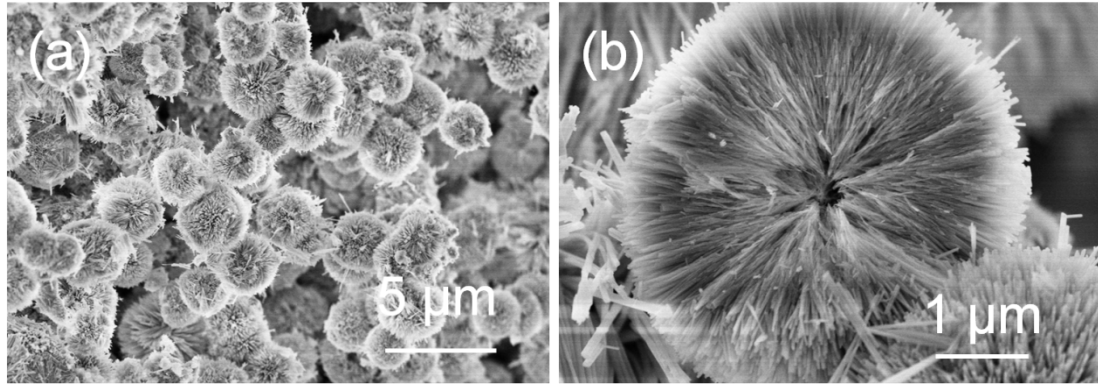

**Fig. S5** (a and b) SEM images of the sample synthesized with urea.

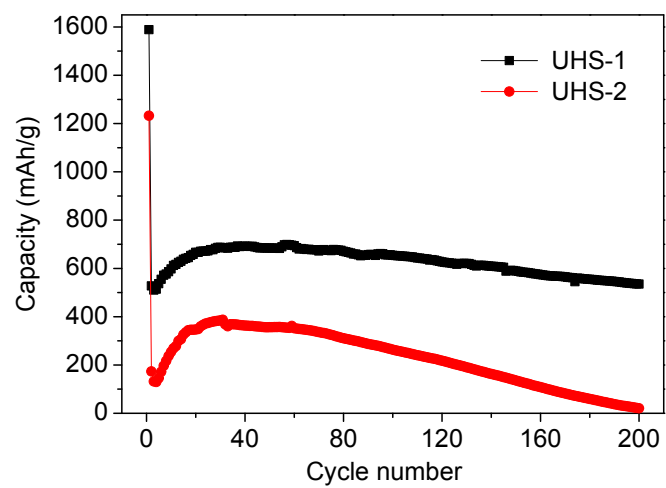

**Fig. S6** The cycle performances of UHS-1 and UHS-2 after calcining at a current density of 1 A/g.



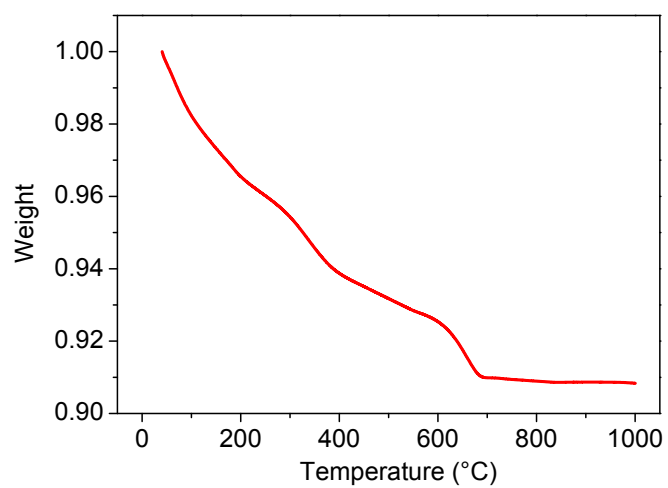

**Fig. S7** The thermogravimetric (TG) analysis of UHS-1.

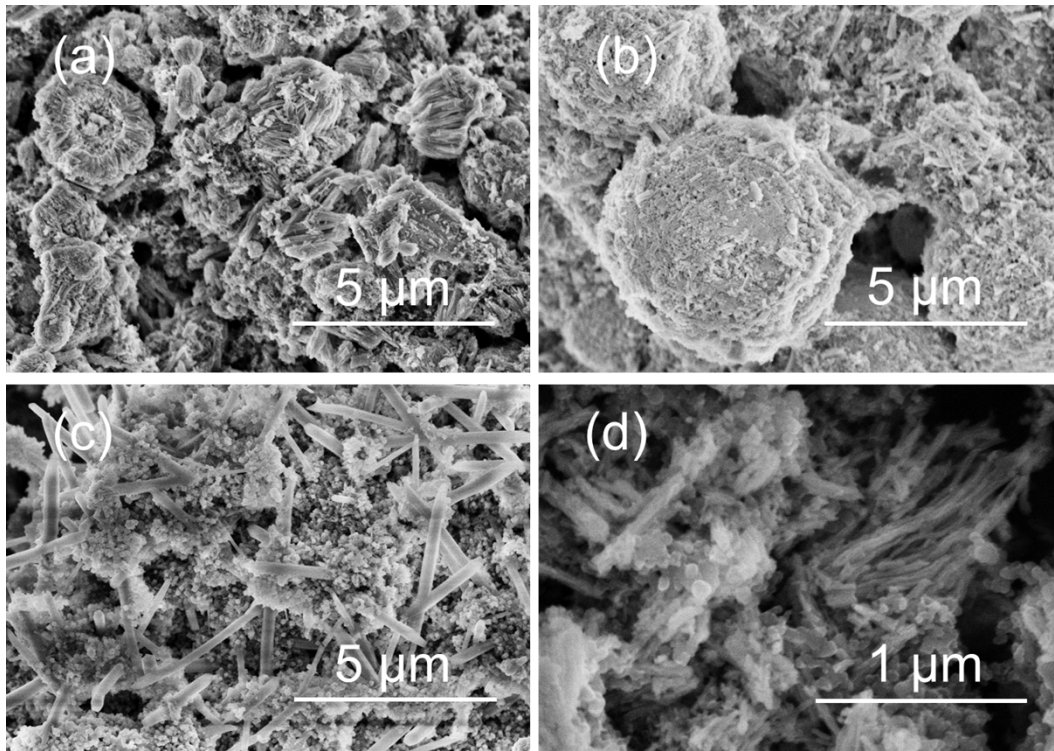

**Fig. S8** SEM images of the  $\text{Ca}_2\text{Ge}_7\text{O}_{16}$  anodes, (a) UHS-1 anode before cycling, (b) UHS-2 anode before cycling, (c) UHS-1 anode after 200 cycles, (d) UHS-2 anode after 200 cycles.
